# Supplementary material
Source: Springer Nature journal article supplement (https://www.springermedizin.de/resource/supplementary/12885_2012_3669_MOESM7_ESM.pdf/9465878)

**A**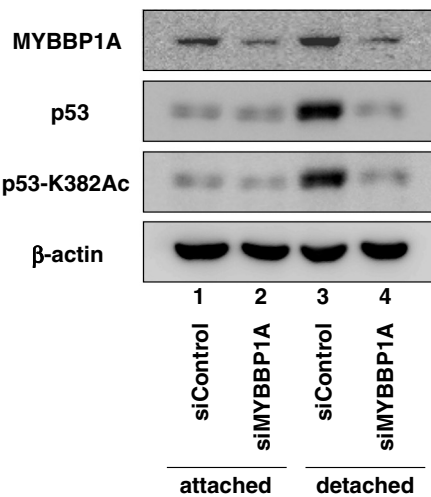**B**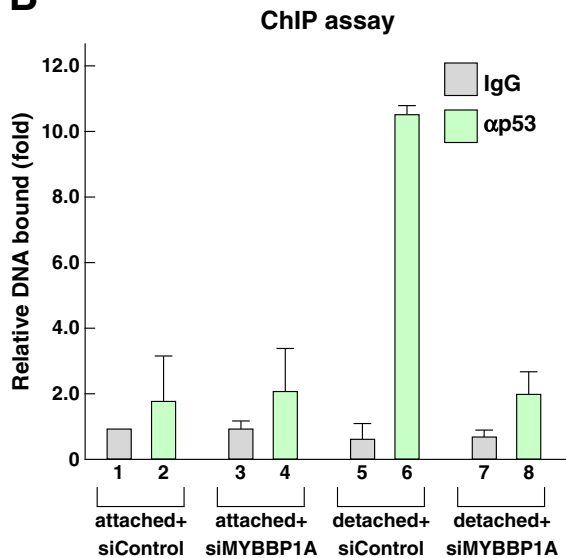**C**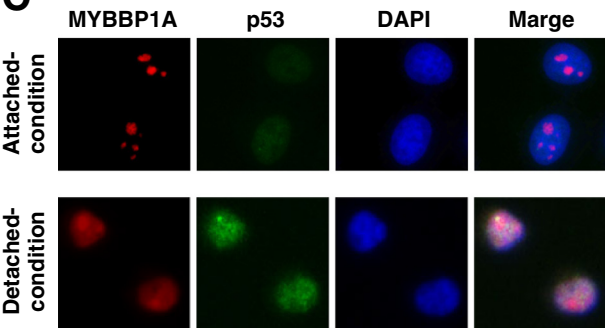**D**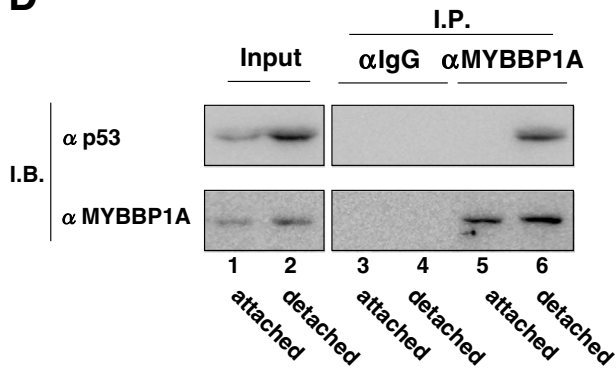

Supplement: MOESM7 [file 9465878]
